# Supplementary material
Source: Springer Nature journal article supplement (https://www.springermedizin.de/resource/supplementary/12881_2009_1279_MOESM8_ESM.pdf/9450632)

**A**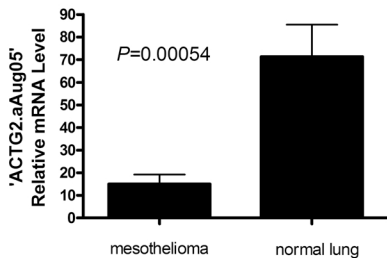**B**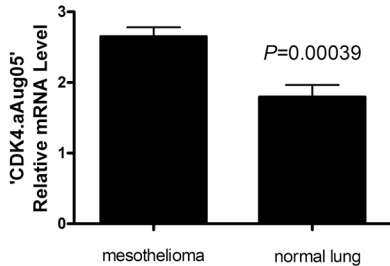**C**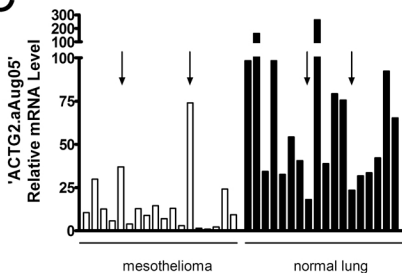**D**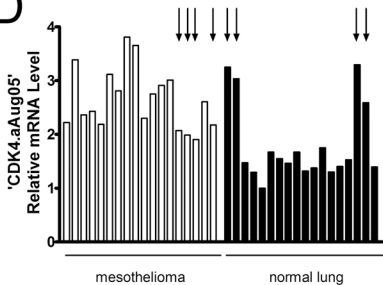

Supplement: MOESM8 [file 9450632]
